# Supplementary material
Source: PubMed Central journal article supplement (PMC2268238)
Supplement: i1536-5050-096-02-0147-s1-f2.pdf [file i1536-5050-096-02-0147-s1-f2.pdf]

**Systematic searches for the effectiveness of respite care**

**Su Golder, MSc; Anne Mason, MA; Karen Spilsbury, PhD**

**Figure 2**

Number of included randomized controlled trial (RCT) records available and number of included RCT records retrieved from each database

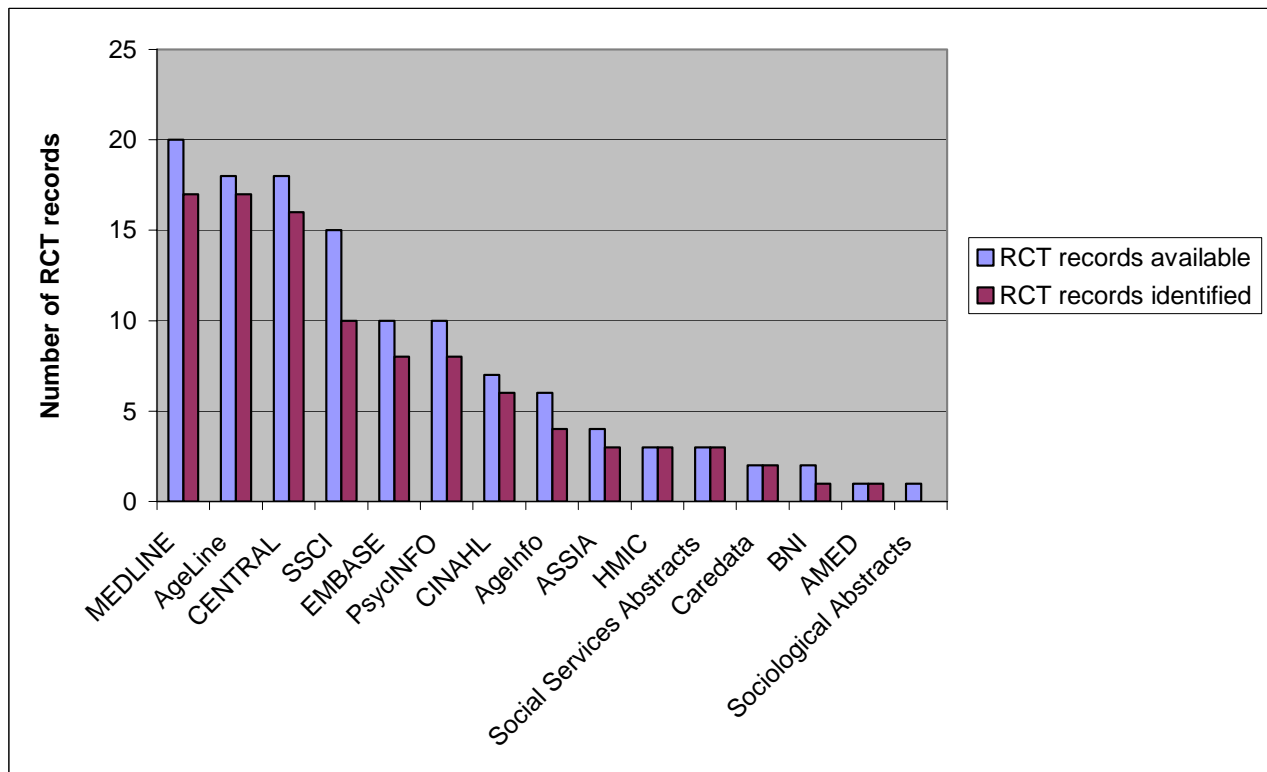

**Key**

- AMED: Allied and Complementary Medicine Database.
- ASSIA: Applied Social Sciences Index and Abstracts.
- BNI: British Nursing Index.
- CENTRAL: Cochrane Central Register of Controlled Trials.
- CINAHL: Cumulative Index to Nursing and Allied Health Literature.
- HEED: Health Economics Evaluation Database.
- HMIC: Health Management Information Consortium.
- NHS EED: NHS Economic Evaluation Database.
- SIGLE: System for Information on Grey Literature in Europe.
- SSCI: Social Science Citation Index.
