# Supplementary material
Source: PubMed Central journal article supplement (PMC2268238)
Supplement: i1536-5050-096-02-0147-s1-t1.pdf [file i1536-5050-096-02-0147-s1-t1.pdf]

## Systematic searches for the effectiveness of respite care

Su Golder, MSc; Anne Mason, MA; Karen Spilsbury, PhD

**Table 1**  
Databases searched

| Type of databases               | Database name                                                                                                                                                                                                                                                                                                                                                                                                                                                                                                                                                                                                                                                                                                                                                                                                                                                                                                                                                                                                                                                                                                                                                                                                                                                                            |
|---------------------------------|------------------------------------------------------------------------------------------------------------------------------------------------------------------------------------------------------------------------------------------------------------------------------------------------------------------------------------------------------------------------------------------------------------------------------------------------------------------------------------------------------------------------------------------------------------------------------------------------------------------------------------------------------------------------------------------------------------------------------------------------------------------------------------------------------------------------------------------------------------------------------------------------------------------------------------------------------------------------------------------------------------------------------------------------------------------------------------------------------------------------------------------------------------------------------------------------------------------------------------------------------------------------------------------|
| Databases of systematic reviews | <ul style="list-style-type: none"> <li>▪ Cochrane Database of Systematic Reviews (CDSR) (Cochrane Library: <a href="http://www.nelh.nhs.uk/cochrane.asp">http://www.nelh.nhs.uk/cochrane.asp</a>)</li> <li>▪ Database of Abstracts of Reviews of Effects (DARE) (Centre for Reviews and Dissemination [CRD] internal database)</li> </ul>                                                                                                                                                                                                                                                                                                                                                                                                                                                                                                                                                                                                                                                                                                                                                                                                                                                                                                                                                |
| Databases on old age and aging  | <ul style="list-style-type: none"> <li>▪ AgeInfo (Centre for Policy on Ageing: <a href="http://www.cpa.org.uk/ageinfo/ageinfo2.html">http://www.cpa.org.uk/ageinfo/ageinfo2.html</a>)</li> <li>▪ AgeLine (DIALOG)</li> </ul>                                                                                                                                                                                                                                                                                                                                                                                                                                                                                                                                                                                                                                                                                                                                                                                                                                                                                                                                                                                                                                                             |
| Health-related databases        | <ul style="list-style-type: none"> <li>▪ Allied and Complementary Medicine Database (AMED) (OvidWeb)</li> <li>▪ British Nursing Index (BNI) (OvidWeb)</li> <li>▪ CINAHL (OvidWeb)</li> <li>▪ Cochrane Central Register of Controlled Trials (CENTRAL) (Cochrane Library: <a href="http://www.nelh.nhs.uk/cochrane.asp">http://www.nelh.nhs.uk/cochrane.asp</a>)</li> <li>▪ EMBASE (OvidWeb)</li> <li>▪ Health Management Information Consortium (HMIC) (Health Management Information Service [HELMIS], Dhdata, and the King's Fund databases) (OvidWeb)</li> <li>▪ Health Technology Assessment Database (HTA) (CRD internal database)</li> <li>▪ MEDLINE (OvidWeb)</li> <li>▪ MEDLINE In Process and other non-indexed citations (OvidWeb)</li> <li>▪ PsycINFO (BIDS: <a href="http://www.bids.ac.uk">http://www.bids.ac.uk</a>)</li> </ul>                                                                                                                                                                                                                                                                                                                                                                                                                                            |
| Social care databases           | <ul style="list-style-type: none"> <li>▪ Applied Social Sciences Index and Abstracts (ASSIA) (CSA Illumina: <a href="http://uk1.csa.com/">http://uk1.csa.com/</a>)</li> <li>▪ Caredata (electronic library for social care eLSC: <a href="http://195.195.162.66/elsc/caredata/caredatasearch.htm">http://195.195.162.66/elsc/caredata/caredatasearch.htm</a>)</li> <li>▪ International Bibliography of the Social Sciences (IBSS) (Bath Information and Data Services [BIDS]: <a href="http://www.bids.ac.uk">http://www.bids.ac.uk</a>)</li> <li>▪ Interventions and Policy Evaluation (C2-RIPE) (Campbell Collaboration: <a href="http://www.campbellcollaboration.org/frontend.asp">http://www.campbellcollaboration.org/frontend.asp</a>)</li> <li>▪ Social Science Citation Index (SSCI) (Web of Science: <a href="http://wos.mimas.ac.uk">http://wos.mimas.ac.uk</a>)</li> <li>▪ Social Services Abstracts (CSA Illumina: <a href="http://uk1.csa.com">http://uk1.csa.com</a>)</li> <li>▪ Social, Psychological, Educational and Criminological Trials Register (C2-SPECTR) (Campbell Collaboration: <a href="http://128.91.199.101/">http://128.91.199.101/</a>)</li> <li>▪ Sociological Abstracts (CSA Illumina: <a href="http://uk1.csa.com">http://uk1.csa.com</a>)</li> </ul> |
| Economic databases              | <ul style="list-style-type: none"> <li>▪ EconLit (BIDS: <a href="http://www.bids.ac.uk">http://www.bids.ac.uk</a>)</li> <li>▪ Health Economics Evaluation Database (HEED) (<a href="http://www.ohe-heed.com">http://www.ohe-heed.com</a>)</li> <li>▪ Internet Documents in Economics Access Service (IDEAS) (working papers sections only: <a href="http://ideas.uqam.ca">http://ideas.uqam.ca</a>)</li> </ul>                                                                                                                                                                                                                                                                                                                                                                                                                                                                                                                                                                                                                                                                                                                                                                                                                                                                           |

- |                                                              |                                                                                                                                                                                                                                                                                                                                                                                                                                                                                                                                                                                                                                                                                                  |
|--------------------------------------------------------------|--------------------------------------------------------------------------------------------------------------------------------------------------------------------------------------------------------------------------------------------------------------------------------------------------------------------------------------------------------------------------------------------------------------------------------------------------------------------------------------------------------------------------------------------------------------------------------------------------------------------------------------------------------------------------------------------------|
| Databases of Conference proceedings                          | <ul style="list-style-type: none"><li>▪ NHS Economic Evaluation Database (NHS EED) (CRD internal database)</li><li>▪ Inside Conferences (DIALOG)</li><li>▪ ISI Proceedings: science &amp; technology (Web of Knowledge: <a href="http://wos.mimas.ac.uk">http://wos.mimas.ac.uk</a>)</li><li>▪ ISI Proceedings: social sciences and humanities (Web of Knowledge: <a href="http://wos.mimas.ac.uk">http://wos.mimas.ac.uk</a>)</li></ul>                                                                                                                                                                                                                                                         |
| Database of reports, dissertations and other gray literature | <ul style="list-style-type: none"><li>▪ Dissertation Abstracts (<a href="http://wwwlib.global.umi.com/dissertations/">http://wwwlib.global.umi.com/dissertations/</a>)</li><li>▪ Index to Theses (<a href="http://www.theses.com">http://www.theses.com</a>)</li><li>▪ System for Information on Grey Literature in Europe (SIGLE) (BIDS: <a href="http://www.bids.ac.uk">http://www.bids.ac.uk</a>)</li></ul>                                                                                                                                                                                                                                                                                   |
| Databases for ongoing and recently completed research        | <ul style="list-style-type: none"><li>▪ ClinicalTrials.gov</li><li>▪ ESRC SocietyToday Database (<a href="http://www.esrc.ac.uk/ESRCInfoCentre/index.aspx">http://www.esrc.ac.uk/ESRCInfoCentre/index.aspx</a>)</li><li>▪ MetaRegister of Controlled Trials (<a href="http://www.controlled-trials.com">http://www.controlled-trials.com</a>)</li><li>▪ National Research Register (NRR) (<a href="http://www.update-software.com/national/">http://www.update-software.com/national/</a>)</li><li>▪ Research Findings Electronic Register (ReFeR) (<a href="http://www.info.doh.gov.uk/doh/refr_web.nsf/Home?OpenForm">http://www.info.doh.gov.uk/doh/refr_web.nsf/Home?OpenForm</a>)</li></ul> |
-
