# Supplementary material
Source: PubMed Central journal article supplement (PMC2268238)
Supplement: i1536-5050-096-02-0147-s1-t2.pdf [file i1536-5050-096-02-0147-s1-t2.pdf]

## Systematic searches for the effectiveness of respite care

**Su Golder, MSc; Anne Mason, MA; Karen Spilsbury, PhD**

---

**Table 2**

Search strategy used in MEDLINE (Ovid)

---

1. caregiv\$.ti,ab.
2. care giv\$.ti,ab.
3. carer\$.ti,ab.
4. informal care.ti,ab.
5. befriending.ti,ab.
6. caretak\$.ti,ab.
7. care taker\$.ti,ab.
8. care taking.ti,ab.
9. children caring.ti,ab.
10. ((parent or parents or mother or mothers or father or fathers) adj2 caring).ti,ab.
11. ((sons or daughters or friends) adj2 (care or caring)).ti,ab.
12. ((husband\$ or wives or wife or spouse\$ or grandparent\$ or grandchild\$ or neighbour\$ or neighbor\$ or relatives) adj2 (care or caring or support or supporting)).ti,ab.
13. families caring.ti,ab.
14. (families adj2 support).ti,ab.
15. Caregivers/
16. Respite Care/
17. care attendant\$.ti,ab.
18. (support service\$ or support program\$ or support scheme\$ or home support).ti,ab.
19. (short stay\$ or break or breaks).ti,ab.
20. day care/
21. (buddy scheme\$ or befriending).ti,ab.
22. night care.ti,ab.
23. (relief adj3 (support or caring or carer or caregiv\$ or care giv\$)).ti,ab.
24. sitting.ti,ab.
25. (holiday\$ or vacation\$).ti,ab.
26. residential home\$.ti,ab.
27. respite.ti,ab.
28. (day centre\$ or day center\$).ti,ab.
29. (day care or daycare or day program\$ or day service\$ or day away).ti,ab.
30. crossroads.ti,ab.
31. (hotel\$ or outing\$).ti,ab.
32. personal assistant\$.ti,ab.
33. leisure.ti,ab.
34. time off.ti,ab.
35. visitor\$.ti,ab.
36. social club\$.ti,ab.
37. friendship club\$.ti,ab.
38. (home-based or inhome).ti,ab.
39. (temporary relief).ti,ab.
40. home care.ti,ab.

41. homecare.ti,ab.
  42. (domicil\$ adj2 service\$.ti,ab.
  43. (domicil\$ adj2 care).ti,ab.
  44. homemaker\$.ti,ab.
  45. (home help\$ or home healthcare or home health care).ti,ab.
  46. (home nursing or night nursing).ti,ab.
  47. (home adj2 service\$.ti,ab.
  48. (home adj2 treatment\$.ti,ab.
  49. or/1-15
  50. or/16-48
  51. 49 and 50
  52. limit 51 to yr=1980-2005
- 

**Key**

ti = title.

ab = abstract.

\$ = wildcard.

adj2 = within 2 words of each other.

yr = year.

/ indicates Medical Subject Heading (MeSH).

---
